# Supplementary material
Source: publisher figshare collection journal article supplement (https://tandf.figshare.com/articles/dataset/_/21617817)

**Supplementary Fig. 1.** Example of vapour pressure deficit (VPD) changes during 20 consecutive days in the two localities studied (Livingston Island and Azkorri Beach) during the growth period of both species (10<sup>th</sup> February-2<sup>nd</sup> March 2018 for *P. endiviifolia* and 1<sup>st</sup> February-20<sup>th</sup> February 2020 for *P. linearis*).

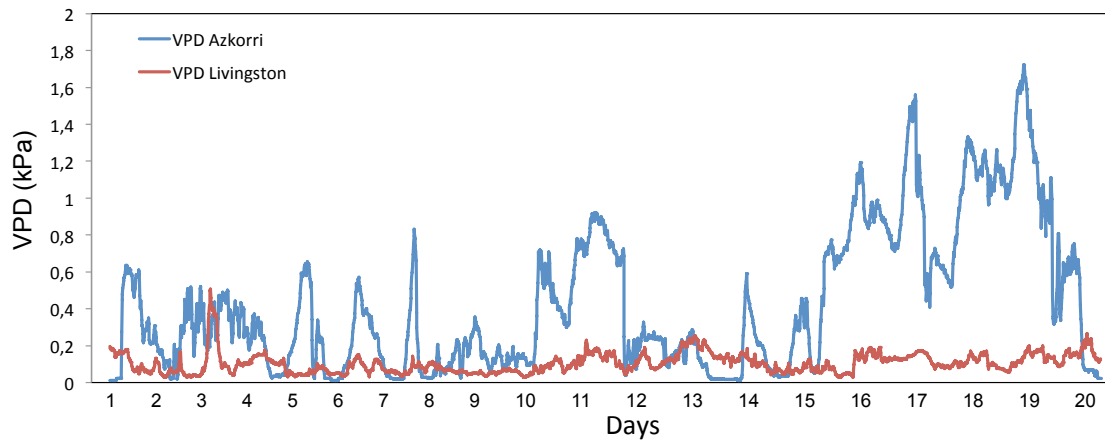

Supplement: Supplementary file 1 [file 1]
