# Supplementary material
Source: publisher figshare collection journal article supplement (https://tandf.figshare.com/articles/dataset/_/21617817)

**Supplementary Fig. 2.** Pigment changes during the desiccation and freezing experiments (80, 50 and 5%) shown in Figures 3 and 4. 100%RH represents control for both desiccation and freezing experiments. Data are mean  $\pm$  SE ( $n= 3-9$ ). Different letters indicate significant differences between both species (Tukey’s test,  $P < 0.05$ ).

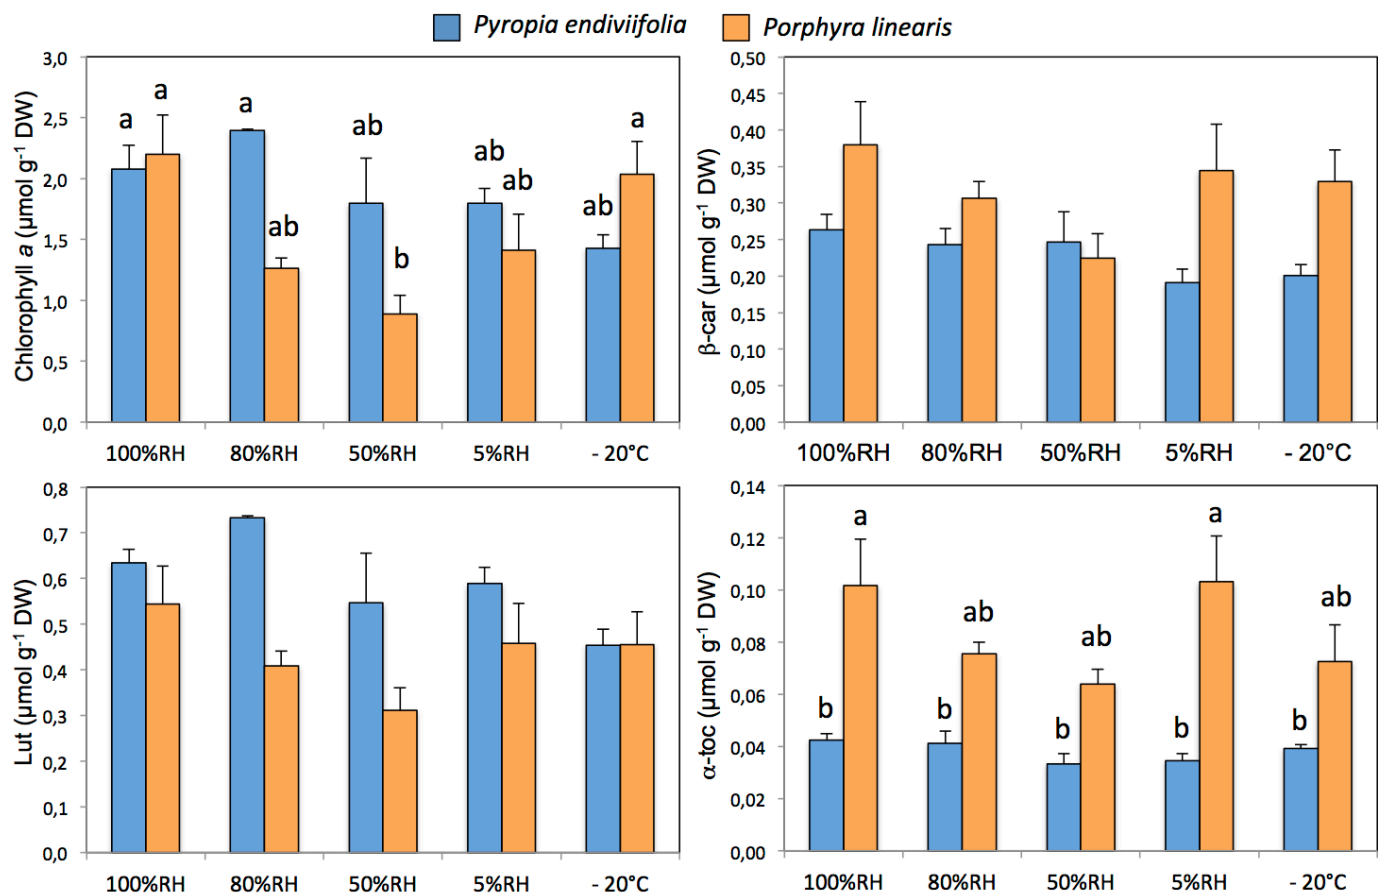

Supplement: Supplementary file 2 [file 1]
